# Supplementary material
Source: PubMed Central journal article supplement (PMC7592234)
Supplement: JVI.01265-20-s0001.pdf [file JVI.01265-20-s0001.pdf]

## Supplementary Materials for

### **Development of a fluorescence based, high-throughput SARS-CoV-2 3CL<sup>pro</sup> reporter assay**

Authors: Heather M. Froggatt, Brook E. Heaton, and Nicholas S. Heaton#

#To whom correspondence should be addressed:

Nicholas S. Heaton, PhD

Email: [nicholas.heaton@duke.edu](mailto:nicholas.heaton@duke.edu)

This file includes:

Fig. S1. Modified FlipGFP construct including NheI site

Fig. S2. Images of background FlipGFP fluorescence

Table S1. Primers for CoV 3CL<sup>pro</sup> responsive FlipGFP constructs

**Fig. S1.**

|                      |                                                                            |             |            |             |            |             |
|----------------------|----------------------------------------------------------------------------|-------------|------------|-------------|------------|-------------|
| FlipGFP (modified)   | 1065 bp ds-DNA                                                             | linear      |            |             |            |             |
| BamHI                | 1..6                                                                       |             |            |             |            |             |
| FlipGFP              | 13..1077                                                                   |             |            |             |            |             |
| NheI                 | 268..2273                                                                  |             |            |             |            |             |
| modified nucleotides | 270..273, 1062, 1065                                                       |             |            |             |            |             |
| TEV cleavage site    | 274..294                                                                   |             |            |             |            |             |
|                      | /product="tobacco etch virus (TEV) protease recognition and cleavage site" |             |            |             |            |             |
|                      | /translation="ENLYFQS"                                                     |             |            |             |            |             |
| 2A                   | 406..459                                                                   |             |            |             |            |             |
| NotI                 | 1078..1085                                                                 |             |            |             |            |             |
| <b>SEQUENCE</b>      |                                                                            |             |            |             |            |             |
| 1                    | ggatccgcc                                                                  | ccatggacct  | gcctgacgac | cactacctgt  | ccaccagac  | catcctgtcc  |
| 61                   | aaggacctga                                                                 | actccggact  | cagatctggc | agcggctctcg | agatggaagt | tagcgcctctg |
| 121                  | gaaaaagaag                                                                 | tgtctgcaact | cgagaaagaa | gtaagtgcc   | ttgagaagga | ggtgtccgca  |
| 181                  | ctcgagaagg                                                                 | aggtcagcgc  | cctggaaaag | gaaaagcgag  | accataggt  | tttgcttgag  |
| 241                  | tatgttacag                                                                 | cggctggcat  | taccgatgcT | AGCgaaaacc  | tgtactttca | gtccaagggtg |
| 301                  | tccgccctga                                                                 | aggaaaaagt  | aagcgcactg | aaagaaaagg  | tgagcgcgct | gaaggagaaa  |
| 361                  | gtgagcgcgc                                                                 | tgaaagagaa  | agtctctgcc | cttaaggagg  | atatacgagg | gagaggaagt  |
| 421                  | ctgctaacat                                                                 | gcggtgacgt  | cgaggagaa  | cctggcccaa  | agcttgccac | catgcgcaaa  |
| 481                  | ggcgaagaac                                                                 | tgtttaccgg  | cattgtgccc | attctggtgg  | aactggatgg | cgatgtgaac  |
| 541                  | ggcataaat                                                                  | tttttgtgcg  | cggcgaaggc | gaaggcgatg  | cgaccattgg | caaactgagc  |
| 601                  | ctgaaattta                                                                 | tttgcaccac  | cggcaaactg | ccgggtgccg  | ggccgaccct | ggtgaccacc  |
| 661                  | ctgacctatg                                                                 | gcgtgcagtg  | ctttagccgc | tatccggatc  | atatgaaacg | ccatgatctt  |
| 721                  | tttaaaagcg                                                                 | cgatgccgga  | aggctatgtg | caggaacgca  | ccatttattt | taaagatgat  |
| 781                  | ggcacctata                                                                 | aaaccgcgc   | ggaagtgaaa | tttgaaggcg  | ataccctgg  | gaaccgcatt  |
| 841                  | gaactgaaag                                                                 | gcattgattt  | taaagaagat | ggcaacattc  | tgggccataa | actggaatat  |
| 901                  | aactttaaca                                                                 | gccataaagt  | gtatattacc | gcggataaac  | agaacaacgg | cattaaagcg  |
| 961                  | aactttacca                                                                 | ttcgccataa  | cgtggaagat | ggcagcgtgc  | agctggcgga | tcattatcag  |
| 1021                 | cagaacacc                                                                  | cgattggcga  | tggcccgggt | cttcttctcg  | gAggAcgctc | tagataggcg  |
| 1081                 | gccgc                                                                      |             |            |             |            |             |

**Fig. S1. Modified FlipGFP construct.** Nucleotide sequence of the modified FlipGFP construct used in this study. Capital letters indicate nucleotide changes introduced to silently create a new *NheI* site and eliminate an existing *NotI* site within FlipGFP.

**Fig. S2.**

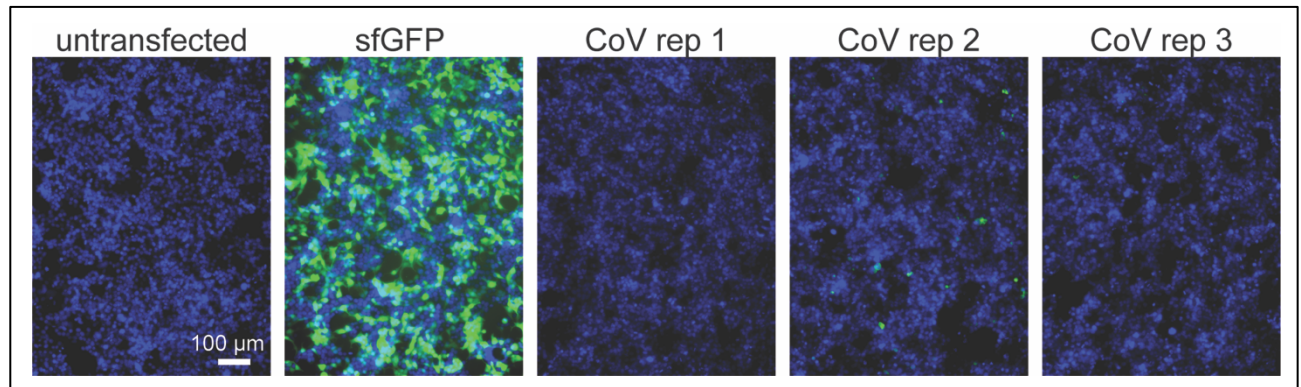

**Fig. S2. Images of background FlipGFP fluorescence.** Images of 293T cells 48 hours post-transfection with each FlipGFP reporter or sfGFP. Green = fluorescing GFP, blue = nuclei. Scale bars are 100μm. Experiment performed twice.

**Table S1.** Primers for CoV 3CL<sup>pro</sup> responsive FlipGFP constructs

| <b>Name</b>   | <b>Sequence</b>                                                |
|---------------|----------------------------------------------------------------|
| FlipGFP For   | gaagacaccgactctactagaggatccgccaccatggacctgcctgacgaccac         |
| FlipGFP Rev   | cagacgcgtcggggccctctagactcgagcggccgcctatctagagcgTccTcc         |
| CoV rep 1 For | gctggcattaccgatgcTAGCagcgcctgctgcagagcggcttcaaggtgtccgccctgaa  |
| CoV rep 2 For | gctggcattaccgatgcTAGCaccgtgaagctgcaggccggcttcaaggtgtccgccctgaa |
| CoV rep 3 For | gctggcattaccgatgcTAGCgtggccagactgcagagcggcttcaaggtgtccgccctgaa |
